# Supplementary material for: High chemiluminescence activity of an FeIII–TAML activator in aqueous–organic media and its use in the determination of organic peroxides
Source: Royal Society of Chemistry journal article supplement (doi:10.1039/c4an01943a), 2015-01-01
Supplement: c4an01943a1.pdf [file c4an01943a1.pdf]

## 2. Experimental

### 2.1. Chemical and reagents

Fe<sup>III</sup>-TAML activator (Fe<sup>III</sup>-TAML) was obtained from GreenOx Catalysts, Inc. (USA). The concentration of Fe<sup>III</sup>-TAML solutions was estimated by measuring absorbance using  $\epsilon_{366} = 6600 \text{ M}^{-1}\text{cm}^{-1}$ .

Luminol, hemin, and Tris were purchased from Aldrich (USA). Horseradish peroxidase (HRP, type VI-A, RZ 3.0) and tert-butyl hydroperoxide – from Sigma. Benzoyl peroxide (BP) was a gift of Dr N.Yudin. Hydrogen peroxide (30%), isopropanol, acetonitrile and ethanol were from ChemMed (Russia). All organic solvents were distilled prior to use. The concentration of H<sub>2</sub>O<sub>2</sub> was estimated by measuring absorbance using  $\epsilon_{240} = 43.6$ .

### 2.2. Chemiluminescent determination of TAML activity in luminol oxidation with H<sub>2</sub>O<sub>2</sub> in aqueous-organic solutions

Determination of the catalytic activity of Fe<sup>III</sup>-TAML was carried out as follows: 30  $\mu\text{l}$  of Fe<sup>III</sup>-TAML solution were mixed with 270  $\mu\text{l}$  of 22.2 mM carbonate buffer (pH 9.9 or 10.5) containing 55.5 mM Tris, 30  $\mu\text{M}$  luminol, 0.11 mM H<sub>2</sub>O<sub>2</sub> and organic solvent in wells of black polystyrene plates for CL enzyme immunoassay (MaxiSorp, NUNC, Denmark). The final concentration of Fe<sup>III</sup>-TAML in plate wells was  $10^{-8} \text{ M}$ . CL intensity was measured at room temperature on a luminometer SpectraMax L (USA). The light intensity was expressed in relative luminescence units (RLU).

### 2.3. pH-dependence of Fe<sup>III</sup>-TAML-catalyzed oxidation of luminol with H<sub>2</sub>O<sub>2</sub> in aqueous-organic solutions

pH-dependence of Fe<sup>III</sup>-TAML-catalyzed oxidation of luminol was assayed as follows: 275  $\mu\text{l}$  of 21.8 mM carbonate buffer, pH 9.0–10.5 containing 55.5 mM Tris, 0.11 mM hydrogen peroxide, 30  $\mu\text{M}$  luminol and organic solvent were mixed with 25  $\mu\text{l}$  of Fe<sup>III</sup>-TAML solution ( $1.2 \times 10^{-7} \text{ M}$ ) in wells of black polystyrene plates. CL kinetics was measured at room temperature on

a luminometer SpectraMax L (USA). The chemiluminescent signal in the absence of Fe<sup>III</sup>-TAML was taken as background value.

### 2.3. *Determination of kinetic constants of Fe<sup>III</sup>-TAML-catalyzed oxidation of luminol in 20% acetonitrile*

All kinetic measurements were performed using a Shimadzu UV-2401PC spectrophotometer equipped with a thermostatted cell holder at 25<sup>0</sup> C. Stock solutions of Fe<sup>III</sup>-TAML (1.5 mM) and luminol (100 mM) were prepared in acetonitrile and 0.4 M NaOH, respectively. The catalytic luminol oxidation reactions were carried out in 20 mM carbonate, pH 10.5 with 50 mM Tris. Initial rates of luminol oxidation were calculated from the linear absorbance versus time plots using the differential coefficient of extinction (349 nm) for luminol of 5900 M<sup>-1</sup> cm<sup>-1</sup>, when the conversion of the luminol did not exceed 10%. A typical kinetic run was performed as follows: appropriate amounts of the stock solutions of Fe<sup>III</sup>-TAML and luminol were added in a cuvette with the carbonate buffer. To initiate the oxidation a required amount of the stock solution of H<sub>2</sub>O<sub>2</sub> was added to a 1 ml of reaction mixture. Calculations of the rate constants were carried out using a SigmaPlot 8.0 using the following equation.

$$\frac{d[\text{luminol}]}{dt} = \frac{k_1 k_{II} [\text{Fe(III)-TAML}] [\text{peroxide}] [\text{luminol}]}{k_I [\text{peroxide}] + k_{II} [\text{luminol}]}$$

### 2.4. *Chemiluminescent determination of organic peroxides*

The determination of organic peroxides was carried out as follows: 30 µl of Fe<sup>III</sup>-TAML solution were mixed with 270 µl of 22.2 mM carbonate buffer, pH 10.5 containing 55.5 mM Tris, 30 µM luminol, 0-55.6 µM BP or 0-556 µM TBH and 11% or 22.2% of organic solvent (ethanol, isopraponol or acetonitrile) in wells of black polystyrene plates for CL enzyme immunoassay. The final concentration of Fe<sup>III</sup>-TAML in plate wells was 10<sup>-8</sup> M. Chemiluminescence intensity was measured at room temperature on a luminometer SpectraMax L (USA).
